# Supplementary material for: Longitudinal Circulating Tumor DNA Analysis in Blood and Saliva for Prediction of Response to Osimertinib and Disease Progression in EGFR-Mutant Lung Adenocarcinoma
Source: MDPI journal article supplement (doi:10.3390/cancers13133342), 2021-07-03

## **Supplementary Figure legends**

**Supplementary Figure S1.** Multi-Planar Volume Rendered (MPVR) images show the volume and shape of a lung lesion in LAT011 and multiple liver lesions in LAT001. Baseline axial (A) and coronal (B) images, versus follow up axial (C) and coronal (D) images at follow up.

**Supplementary Figure S2.** Patients without ctDNA progression prior to RECIST 1.1 progression.

**Supplementary Figure S3.** Patients with no RECIST 1.1 progression.

**Supplementary Figure S1. Assessment of tumor volume by volumetric CT measurement.**

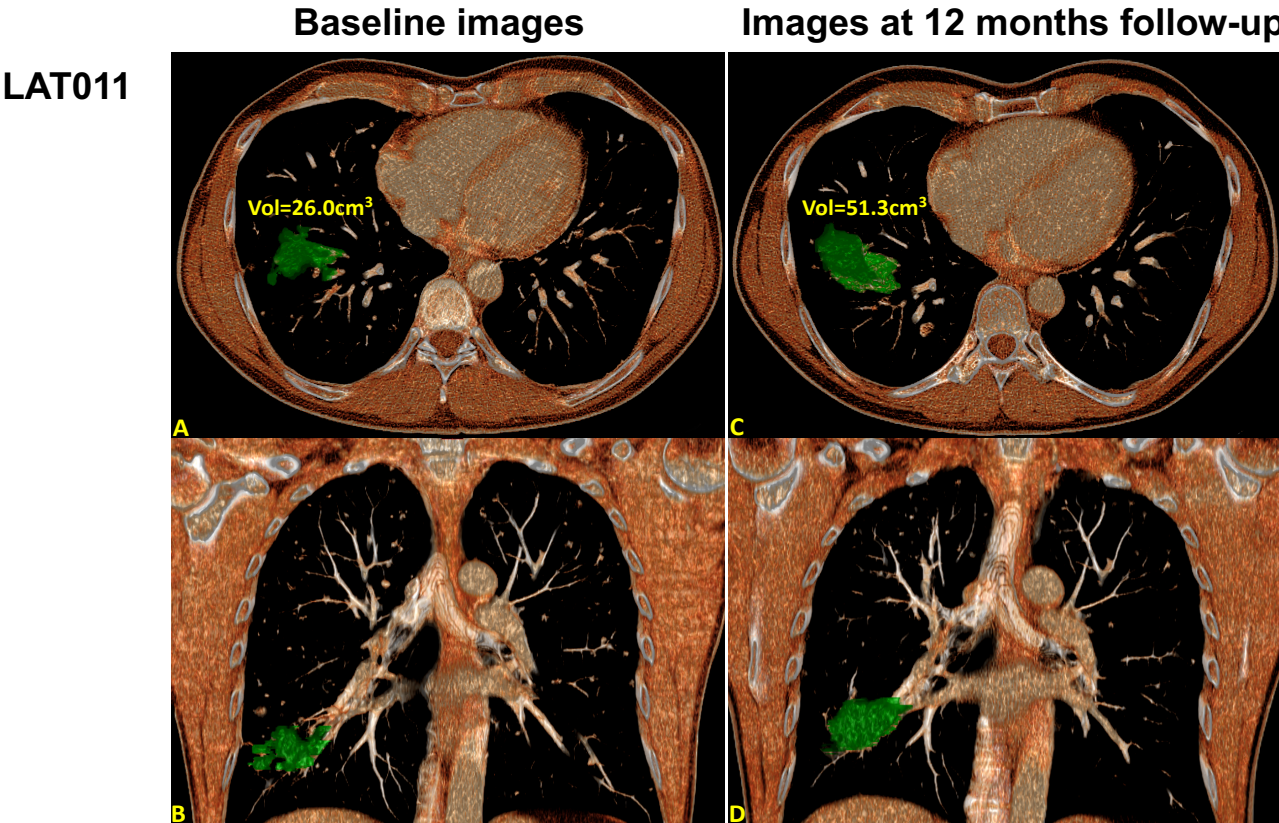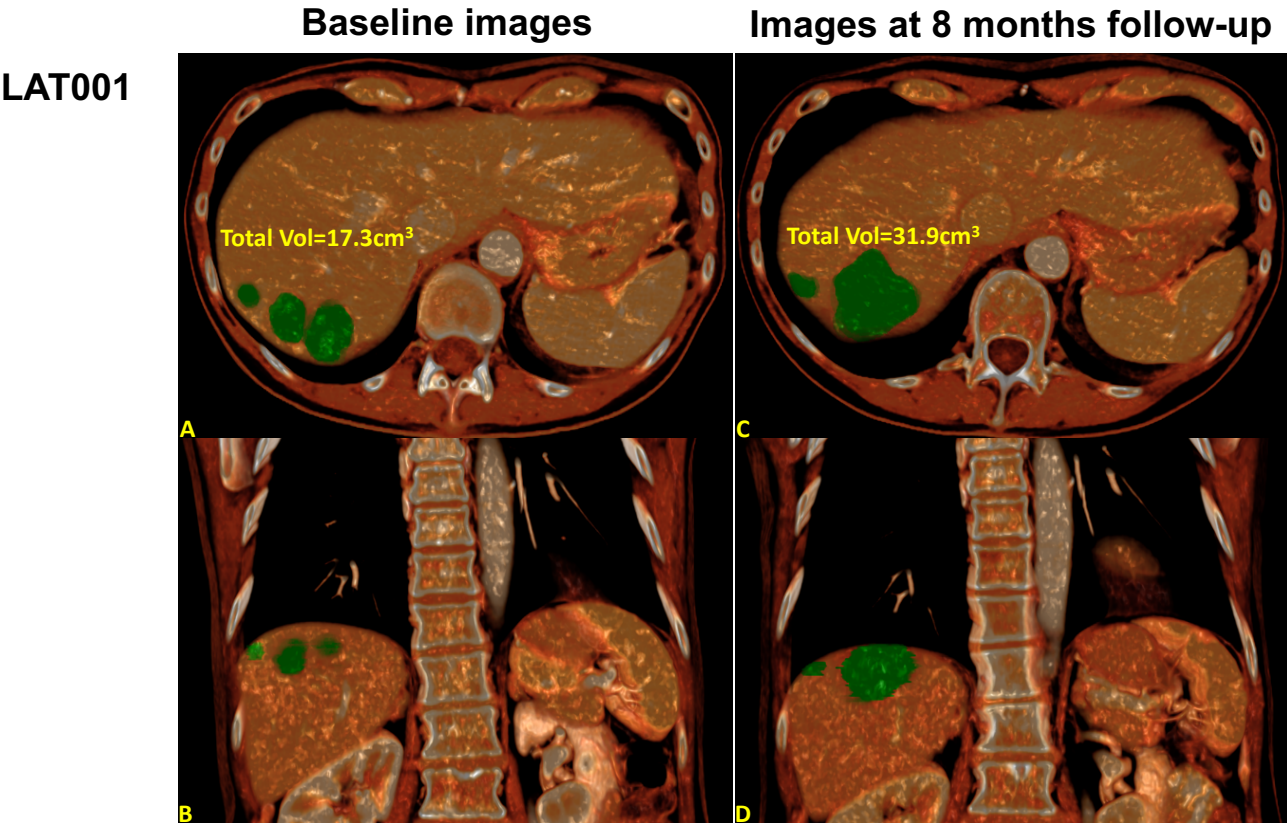

**Supplementary Figure S2. Patients without ctDNA progression prior to RECIST progression.**

## ddPCR

## NGS

**eLB**

**LAT011**

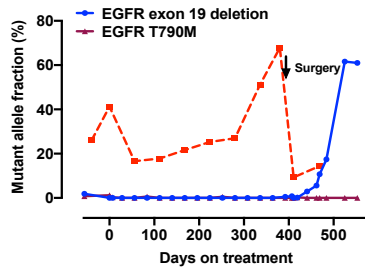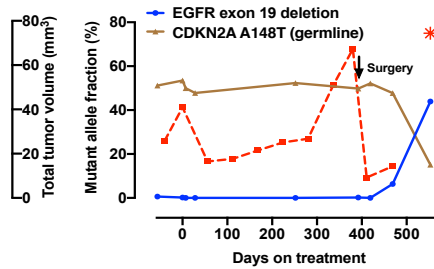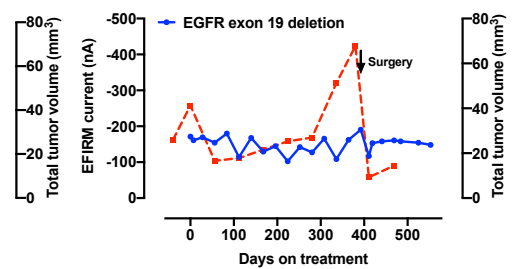

**LAT020**

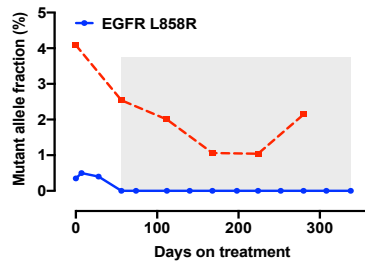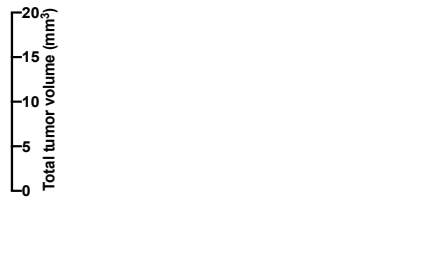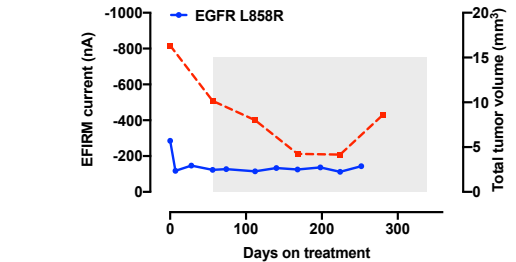

LAT021 C

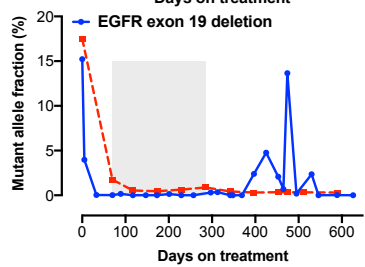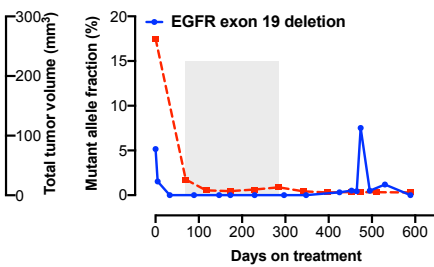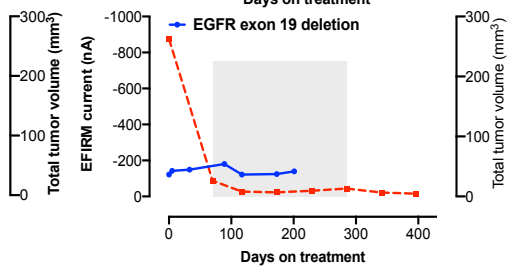

**D**  
**-AT0022**

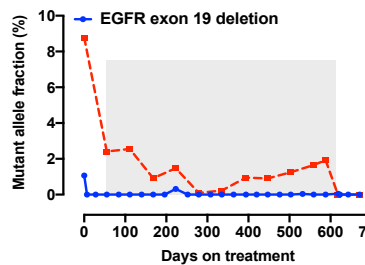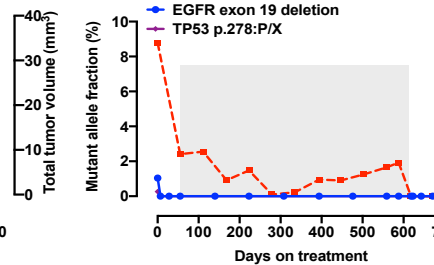

LAT025 Ⅲ

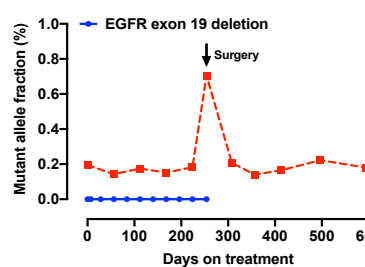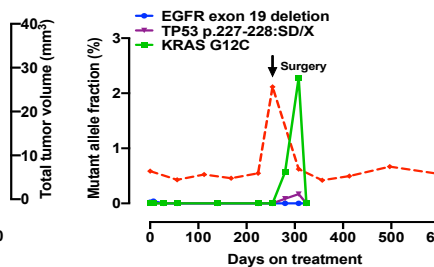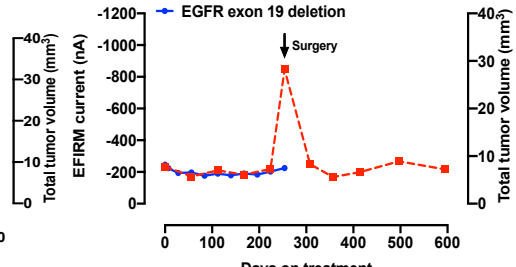

Supplementary Figure S3. Patients with no RECIST progression.

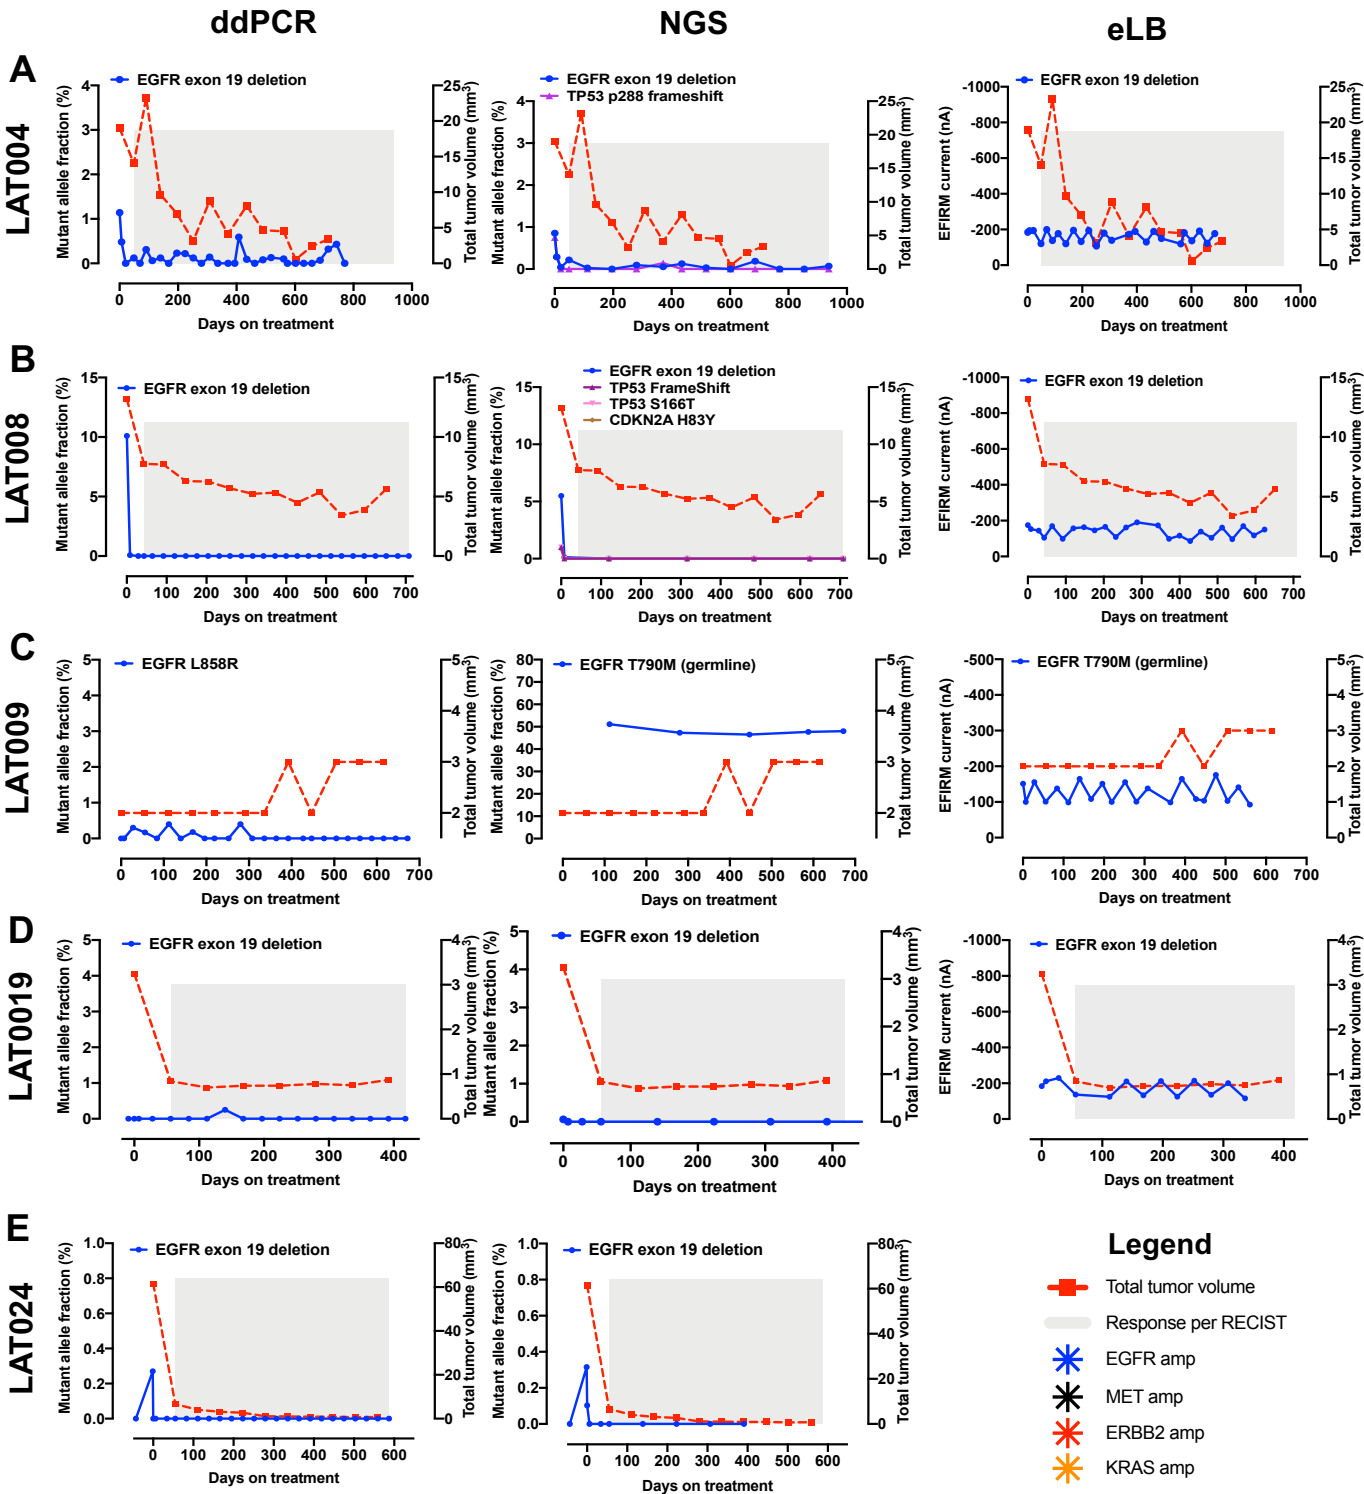

Supplement: s1 [file s1]
