# Supplementary material for: Longitudinal Circulating Tumor DNA Analysis in Blood and Saliva for Prediction of Response to Osimertinib and Disease Progression in EGFR-Mutant Lung Adenocarcinoma
Source: MDPI journal article supplement (doi:10.3390/cancers13133342), 2021-07-03
Supplement: s1 [file s1]

**Supplementary Table S1. Patient characteristics.**

|                              |                         |                   |
|------------------------------|-------------------------|-------------------|
| <b>Median age</b>            |                         | 60 (range: 30-77) |
| <b>Sex</b>                   | Female                  | 18 (72%)          |
|                              | Male                    | 7 (28%)           |
| <b>Race</b>                  | White                   | 14 (56%)          |
|                              | Asian                   | 5 (20%)           |
|                              | African American        | 5 (20%)           |
|                              | Multirace               | 1 (4%)            |
| <b>Histology</b>             | Adenocarcinoma          | 25 (100%)         |
| <b><i>EGFR</i> mutations</b> | Exon 19 deletion        | 10 (40%)          |
|                              | L858R                   | 4 (16%)           |
|                              | Exon 19 deletion/T790M  | 8 (32%)           |
|                              | Exon L8585R/T790M       | 2 (8%)            |
|                              | Exon 20 insertion/V769L | 1 (4%)            |
| <b>Cohort</b>                | 1                       | 15 (60%)          |
|                              | 2                       | 7 (28%)           |
|                              | 3                       | 3 (12%)           |

**Supplementary Table S2. List of *EGFR* mutations detected by ddPCR.**

| <b>Amino Acid Change</b> | <b>Nucleotide Mutation</b> | <b>Chromosomal Location (hg19)</b> | <b>Amplicon Length (bp)</b> | <b>COSMIC ID</b> | <b>Mutation Description</b> |
|--------------------------|----------------------------|------------------------------------|-----------------------------|------------------|-----------------------------|
| p.E746_A750delELREA      | c.2235_2249del15           | chr7:55242404-55242540             | 78                          | COSM6223         | Deletion - In frame         |
| p.E746_A750delELREA      | c.2236_2250del15           | chr7:55242405-55242541             | 91                          | COSM6225         | Deletion - In frame         |
| p.E746_S752>V            | c.2237_2256>TC             | chr7:55242406-55242547             | 99                          | COSM18426        | Complex - deletion inframe  |
| p.L747_A750>P            | c.2239_2248TTAA GAGAAG>C   | chr7:55242408-55242539             | 84                          | COSM12382        | Complex - deletion inframe  |
| p.V769L                  | c.2305G>C                  | chr7:55248946-55249068             | 59                          | NA               | Substitution - Missense     |
| p.T790M                  | c.2369C>T                  | chr7:55249010-55249132             | 80                          | COSM6240         | Substitution - Missense     |
| p.L858R                  | c.2573T>G                  | chr7:55259454-55259576             | 73                          | COSM6224         | Substitution - Missense     |

Supplementary Table S3. 36 genes included in InvisionFirst™-Lung

|         |         |        |         |          |        |
|---------|---------|--------|---------|----------|--------|
| AKT1    | ● ALK   | BRAF   | CCND1   | ● CDKN2A | CTNNB1 |
| ● EGFR  | ● ERBB2 | ESR1   | ● FGFR1 | FGFR2    | FGFR3  |
| GATA3   | GNA11   | GNAQ   | GNAS    | HRAS     | IDH1   |
| IDH2    | KIT     | KRAS   | MAP2K1  | ● MET    | MYC    |
| NFE2L2  | NRAS    | NTRK1  | NTRK3   | PDGFRA   | PIK3CA |
| PPP2R1A | ● PTEN  | ● ROS1 | ● STK11 | ● TP53   | U2AF1  |

SNVs + Indels - Hotspot Regions

● Fusions + SNVs + Indels

● CNVs + SNVs + Indels

● CNVs only

● SNVs + Indels - Exon Coverage  
70% for PTEN, 88-100% for TP53,  
STK11 and CDKN2A

**Supplementary Table S4. Probe sequences: Capture probe and detector probe oligonucleotide sequences for three TKI-sensitive mutations. The detector probes are biotinylated at the 3' end.**

|                  | <b>Capture Probe Sequences</b> | <b>Detector Probe Sequences</b>                   |
|------------------|--------------------------------|---------------------------------------------------|
| Exon 19 deletion | 5' – TGTTGCTTCCTTG – 3'        | 5' – ATAGCGACGGGAATTTTAACTTTCTCACCT – 3'          |
| p.L858R          | 5' – GTTTGACCCGCCCA – 3'       | 5' – AAAATCTGTGATCTTGACATGCTGCGGTGTTTTGTGCAG – 3' |
| p.T790M          | 5' – GAGCGGCATGATGA – 3'       | 5' – GCTGCACGGTGGAGGTGAGGCAGATGCCCAGC – 3'        |

**Supplementary Table S5. Number and sites of lesions measured by volumetric measurements.**

| <b>LAT</b> | <b>CT Scan<br/>(time<br/>point)</b> | <b>Total<br/>Lesion</b> | <b>Pulmonary</b> | <b>Liver</b> | <b>Node</b> | <b>Other</b> |
|------------|-------------------------------------|-------------------------|------------------|--------------|-------------|--------------|
| 001        | 8                                   | 26                      | 1                | 25           | 0           | 0            |
| 002        | 9                                   | 2                       | 1                | 0            | 1           | 0            |
| 003        | 11                                  | 3                       | 1                | 2            | 0           | 0            |
| 004        | 14                                  | 1                       | 1                | 0            | 0           | 0            |
| 005        | 4                                   | 5                       | 2                | 0            | 1           | 2            |
| 006        | 10                                  | 10                      | 5                | 0            | 4           | 1            |
| 007        | 17                                  | 1                       | 1                | 0            | 0           | 0            |
| 008        | 13                                  | 3                       | 1                | 1            | 1           | 0            |
| 009        | 12                                  | 3                       | 1                | 0            | 0           | 2            |
| 010        | 13                                  | 4                       | 1                | 1            | 2           | 0            |
| 011        | 12                                  | 6                       | 3                | 2            | 0           | 1            |
| 013        | 4                                   | 3                       | 1                | 2            | 0           | 0            |
| 014        | 13                                  | 3                       | 2                | 1            | 0           | 0            |
| 015        | 5                                   | 2                       | 2                | 0            | 0           | 0            |
| 016        | 19                                  | 4                       | 1                | 1            | 0           | 2            |
| 017        | 5                                   | 6                       | 1                | 0            | 1           | 4            |
| 019        | 9                                   | 1                       | 1                | 0            | 0           | 0            |
| 020        | 6                                   | 2                       | 2                | 0            | 0           | 0            |
| 021        | 12                                  | 6                       | 1                | 0            | 2           | 3            |
| 022        | 14                                  | 3                       | 3                | 0            | 0           | 0            |
| 023        | 13                                  | 2                       | 1                | 0            | 1           | 0            |
| 024        | 11                                  | 2                       | 2                | 0            | 0           | 0            |
| 025        | 12                                  | 5                       | 2                | 0            | 3           | 0            |
| 026        | 13                                  | 3                       | 1                | 0            | 1           | 1            |
| 028        | 6                                   | 6                       | 2                | 0            | 1           | 3            |
| Average    | 10.6                                | 4.48                    | 1.6              | 1.4          | 0.72        | 0.76         |
| Min        | 4                                   | 1                       | 1                | 0            | 0           | 0            |
| Max        | 19                                  | 26                      | 5                | 25           | 4           | 4            |
| total      | 265                                 | 112                     | 40               | 35           | 18          | 19           |
| Median     | 12                                  | 3                       | 1                | 0            | 0           | 0            |

**Supplementary Table S6. Spearman correlation between allele frequencies of sensitizing *EGFR* mutations by ddPCR and NGS, current values (nA) of eLB, and calculated tumor volume.**

|                    | ddPCR | NGS    | eLB    | Calculated tumor volume |
|--------------------|-------|--------|--------|-------------------------|
| ddPCR              | 1     | 0.93*  | 0.24*  | 0.35*                   |
| NGS                | 0.93* | 1      | 0.24** | 0.46*                   |
| eLB                | 0.24* | 0.24** | 1      | 0.28*                   |
| Total tumor volume | 0.35* | 0.46*  | 0.28*  | 1                       |

\* P value <0.001 (test of  $r=0$ )

\*\* P value <0.05
