# Supplementary material for: Longitudinal Circulating Tumor DNA Analysis in Blood and Saliva for Prediction of Response to Osimertinib and Disease Progression in EGFR-Mutant Lung Adenocarcinoma
Source: MDPI journal article supplement (doi:10.3390/cancers13133342), 2021-07-03
Supplement: s1 [file s1]

| Patient ID | Collection Date | TxDay | Cycle     | Code                                      | Gene name | Protein change      | Consequence          | Cosmic name | Frequency percentage |
|------------|-----------------|-------|-----------|-------------------------------------------|-----------|---------------------|----------------------|-------------|----------------------|
| LAT001     | 2016-04-13      | -7    | Pre       | del_chr17_7675997_GCAAGTCACAGACTTGGCTGT_- | TP53      | p.118-124:TAKSVTC/- | inframe deletion     | NA          | 16.5241              |
|            |                 |       |           | del_chr7_55174772_GGAATTAAGAGAAGC_-       | EGFR      | p.745-750:KELREA/K  | inframe deletion     | COSM6223    | 49.1711              |
|            |                 |       |           | amplification KRAS                        | KRAS      | NA                  | NA                   | NA          | 55.5749              |
|            |                 |       |           | mis_chr3_179234289_T_G                    | PIK3CA    | p.N1044K            | missense variant     | COSM27504   | 31.2968              |
|            | 2016-04-20      | 0     | C1D0      | del_chr17_7675997_GCAAGTCACAGACTTGGCTGT_- | TP53      | p.118-124:TAKSVTC/- | inframe deletion     | NA          | 0.8451               |
|            |                 |       |           | del_chr7_55174772_GGAATTAAGAGAAGC_-       | EGFR      | p.745-750:KELREA/K  | inframe deletion     | COSM6223    | 2.5880               |
|            |                 |       |           | mis_chr3_179234289_T_G                    | PIK3CA    | p.N1044K            | missense variant     | COSM27504   | 1.1620               |
|            | 2016-07-06      | 84    | C5D1      | mis_chr7_55191822_T_G                     | EGFR      | p.L858R             | missense variant     | COSM6224    | 0.1563               |
|            |                 |       |           | del_chr7_55174772_GGAATTAAGAGAAGC_-       | EGFR      | p.745-750:KELREA/K  | inframe deletion     | COSM6223    | 0.1651               |
|            | 2016-09-07      | 147   | C8D1      | mis_chr7_55181378_C_T                     | EGFR      | p.T790M             | missense variant     | COSM6240    | 0.9906               |
|            |                 |       |           | mis_chr7_55191822_T_G                     | EGFR      | p.L858R             | missense variant     | COSM6224    | 0.4953               |
|            |                 |       |           | del_chr17_7675997_GCAAGTCACAGACTTGGCTGT_- | TP53      | p.118-124:TAKSVTC/- | inframe deletion     | NA          | 0.1980               |
|            | 2016-09-28      | 168   | C9D1      | del_chr7_55174772_GGAATTAAGAGAAGC_-       | EGFR      | p.745-750:KELREA/K  | inframe deletion     | COSM6223    | 5.6188               |
|            |                 |       |           | mis_chr3_179234289_T_G                    | PIK3CA    | p.N1044K            | missense variant     | COSM27504   | 0.6188               |
|            |                 |       |           | amplification EGFR                        | EGFR      | NA                  | NA                   | NA          | NA                   |
|            |                 |       |           | amplification MET                         | MET       | NA                  | NA                   | NA          | NA                   |
|            | 2016-11-09      | 210   | C11D1     | del_chr17_7675997_GCAAGTCACAGACTTGGCTGT_- | TP53      | p.118-124:TAKSVTC/- | inframe deletion     | NA          | 5.6604               |
|            |                 |       |           | del_chr7_55174772_GGAATTAAGAGAAGC_-       | EGFR      | p.745-750:KELREA/K  | inframe deletion     | COSM6223    | 46.8160              |
|            |                 |       |           | amplification KRAS                        | KRAS      | NA                  | NA                   | NA          | 53.7028              |
|            |                 |       |           | mis_chr3_179234289_T_G                    | PIK3CA    | p.N1044K            | missense variant     | COSM27504   | 18.8679              |
|            |                 |       |           | del_chr7_55174772_GGAATTAAGAGAAGC_-       | EGFR      | p.745-750:KELREA/K  | inframe deletion     | COSM6223    | 0.0250               |
|            | 2016-11-29      | 230   | ReTxC1D0  | del_chr17_7675997_GCAAGTCACAGACTTGGCTGT_- | TP53      | p.118-124:TAKSVTC/- | inframe deletion     | NA          | 2.7869               |
|            |                 |       |           | del_chr7_55174772_GGAATTAAGAGAAGC_-       | EGFR      | p.745-750:KELREA/K  | inframe deletion     | COSM6223    | 12.1175              |
|            | 2017-01-04      | 266   | ReTxC2D7  | mis_chr3_179234289_T_G                    | PIK3CA    | p.N1044K            | missense variant     | COSM27504   | 4.9590               |
|            |                 |       |           | amplification MET                         | MET       | NA                  | NA                   | NA          | NA                   |
|            |                 |       |           | del_chr17_7675997_GCAAGTCACAGACTTGGCTGT_- | TP53      | p.118-124:TAKSVTC/- | inframe deletion     | NA          | 16.8625              |
|            | 2017-01-25      | 287   | ReTxC3D1  | del_chr7_55174772_GGAATTAAGAGAAGC_-       | EGFR      | p.745-750:KELREA/K  | inframe deletion     | COSM6223    | 53.5250              |
|            |                 |       |           | amplification KRAS                        | KRAS      | NA                  | NA                   | NA          | NA                   |
|            |                 |       |           | mis_chr3_179234289_T_G                    | PIK3CA    | p.N1044K            | missense variant     | COSM27504   | 36.2500              |
|            |                 |       |           | mis_chr7_55191822_T_G                     | EGFR      | p.L858R             | missense variant     | COSM6224    | 0.5978               |
| LAT002     | 2016-05-11      | 0     | C1D0      | No call for this sample                   | NA        | NA                  | NA                   | NA          | NA                   |
|            | 2016-05-18      | 7     | C1D7      | mis_chr7_55191822_T_G                     | EGFR      | p.L858R             | missense variant     | COSM6224    | 0.0917               |
|            | 2016-08-10      | 91    | C5D1      | mis_chr7_55191822_T_G                     | EGFR      | p.L858R             | missense variant     | COSM6224    | 1.0058               |
|            | 2017-01-25      | 259   | C12D1     | mis_chr3_179218303_G_A                    | PIK3CA    | p.E545K             | missense variant     | COSM763     | 0.0641               |
|            | 2017-03-22      | 315   | C14D1     | mis_chr7_55191822_T_G                     | EGFR      | p.L858R             | missense variant     | COSM6224    | 9.9840               |
|            |                 |       |           | mis_chr7_55191822_T_G                     | EGFR      | p.L858R             | missense variant     | COSM6224    | 2.5272               |
|            | 2017-04-19      | 343   | C15D1     | mis_chr7_55191822_T_G                     | EGFR      | p.L858R             | missense variant     | COSM6224    | 2.9000               |
|            | 2017-05-12      | 366   | Off       | mis_chr7_55191822_T_G                     | EGFR      | p.L858R             | missense variant     | COSM6224    | 3.9273               |
|            | 2017-07-31      | 446   | Off       | mis_chr7_55191822_T_G                     | EGFR      | p.L858R             | missense variant     | COSM6224    | 3.9273               |
| LAT003     | 2016-06-01      | 0     | C1D0      | del_chr7_55174772_GGAATTAAGAGAAGC_-       | EGFR      | p.745-750:KELREA/K  | inframe deletion     | COSM6223    | 48.1510              |
|            |                 |       |           | mis_chr17_7675051_A_G                     | TP53      | NA                  | splice donor variant | NA          | 16.8620              |
|            |                 |       |           | mis_chr7_55181378_C_T                     | EGFR      | p.T790M             | missense variant     | COSM6240    | 11.1133              |
|            |                 |       |           | amplification ERBB2                       | ERBB2     | NA                  | NA                   | NA          | NA                   |
|            | 2016-06-08      | 7     | C1D7      | del_chr7_55174772_GGAATTAAGAGAAGC_-       | EGFR      | p.745-750:KELREA/K  | inframe deletion     | COSM6223    | 7.5250               |
|            |                 |       |           | mis_chr17_7675051_A_G                     | TP53      | NA                  | splice donor variant | NA          | 2.3750               |
|            |                 |       |           | mis_chr7_55181378_C_T                     | EGFR      | p.T790M             | missense variant     | COSM6240    | 1.0000               |
|            | 2016-12-14      | 196   | C10D1     | del_chr7_55174772_GGAATTAAGAGAAGC_-       | EGFR      | p.745-750:KELREA/K  | inframe deletion     | COSM6223    | 11.1390              |
|            |                 |       |           | mis_chr17_7675051_A_G                     | TP53      | NA                  | splice donor variant | NA          | 5.5019               |
|            |                 |       |           | mis_chr3_179218303_G_A                    | PIK3CA    | p.E545K             | missense variant     | COSM763     | 0.1255               |
|            | 2017-04-07      | 310   | ReTxC4D1  | del_chr7_55174772_GGAATTAAGAGAAGC_-       | EGFR      | p.745-750:KELREA/K  | inframe deletion     | COSM6223    | 14.2250              |
|            |                 |       |           | mis_chr17_7675051_A_G                     | TP53      | NA                  | splice donor variant | NA          | 13.9375              |
|            |                 |       |           | mis_chr3_179218303_G_A                    | PIK3CA    | p.E545K             | missense variant     | COSM763     | 0.1500               |
|            |                 |       |           | mis_chr7_55181378_C_T                     | EGFR      | p.T790M             | missense variant     | COSM6240    | 0.4000               |
|            | 2017-06-21      | 385   | ReTxC4D1  | del_chr7_55174772_GGAATTAAGAGAAGC_-       | EGFR      | p.745-750:KELREA/K  | inframe deletion     | COSM6223    | 35.0787              |
|            |                 |       |           | mis_chr17_7675051_A_G                     | TP53      | NA                  | splice donor variant | NA          | 4.0748               |
|            |                 |       |           | mis_chr7_55181378_C_T                     | EGFR      | p.T790M             | missense variant     | COSM6240    | 5.4823               |
|            |                 |       |           | mis_chr7_55181399_G_C                     | EGFR      | p.C797S             | missense variant     | NA          | 2.0571               |
|            | 2017-08-16      | 441   | ReTxC6D1  | amplification EGFR                        | EGFR      | NA                  | NA                   | NA          | NA                   |
|            |                 |       |           | amplification ERBB2                       | ERBB2     | NA                  | NA                   | NA          | NA                   |
|            |                 |       |           | del_chr7_55174772_GGAATTAAGAGAAGC_-       | EGFR      | p.745-750:KELREA/K  | inframe deletion     | COSM6223    | 74.1125              |
|            |                 |       |           | mis_chr17_7675051_A_G                     | TP53      | NA                  | splice donor variant | NA          | 22.6500              |
|            | 2017-08-30      | 455   | ReTxC6D14 | mis_chr7_55181378_C_T                     | EGFR      | p.T790M             | missense variant     | COSM6240    | 13.9750              |
|            |                 |       |           | mis_chr7_55181399_G_C                     | EGFR      | p.C797S             | missense variant     | NA          | 4.1250               |
|            |                 |       |           | amplification EGFR                        | EGFR      | NA                  | NA                   | NA          | NA                   |
|            |                 |       |           | del_chr7_55174772_GGAATTAAGAGAAGC_-       | EGFR      | p.745-750:KELREA/K  | inframe deletion     | COSM6223    | 58.3063              |
|            | 2017-10-23      | 509   | Off       | mis_chr17_7675051_A_G                     | TP53      | NA                  | splice donor variant | NA          | 22.3375              |
|            |                 |       |           | mis_chr3_179218303_G_A                    | PIK3CA    | p.E545K             | missense variant     | COSM763     | 0.1125               |
|            |                 |       |           | mis_chr7_55181378_C_T                     | EGFR      | p.T790M             | missense variant     | COSM6240    | 11.6563              |
|            |                 |       |           | mis_chr7_55181399_G_C                     | EGFR      | p.C797S             | missense variant     | NA          | 3.4250               |
|            | 2017-10-23      | 509   | Off       | amplification EGFR                        | EGFR      | NA                  | NA                   | NA          | NA                   |
|            |                 |       |           | del_chr7_55174772_GGAATTAAGAGAAGC_-       | EGFR      | p.745-750:KELREA/K  | inframe deletion     | COSM6223    | 81.3125              |
|            |                 |       |           | mis_chr17_7675051_A_G                     | TP53      | NA                  | splice donor variant | NA          | 21.1000              |
|            |                 |       |           | mis_chr7_55181378_C_T                     | EGFR      | p.T790M             | missense variant     | COSM6240    | 15.1375              |
|            |                 |       |           | mis_chr7_55181399_G_C                     | EGFR      | p.C797S             | missense variant     | NA          | 5.3000               |

|        |            |     |               |                                     |        |                    |                      |            |         |
|--------|------------|-----|---------------|-------------------------------------|--------|--------------------|----------------------|------------|---------|
| LAT004 | 2016-07-13 | 0   | C1D0          | del_chr17_7673758 T -               | TP53   | p.288:N/X          | frameshift_variant   | COSM45459  | 0.8537  |
|        |            |     |               | del_chr7_55174772_GGAATTAAGAGAAGC_- | EGFR   | p.745-750:KELREA/K | inframe_deletion     | COSM6223   | 0.7520  |
|        | 2016-07-20 | 7   | C1D7          | del_chr17_7673758 T -               | TP53   | p.288:N/X          | frameshift_variant   | COSM45459  | 0.3237  |
|        |            |     |               | del_chr7_55174772_GGAATTAAGAGAAGC_- | EGFR   | p.745-750:KELREA/K | inframe_deletion     | COSM6223   | 0.2878  |
|        | 2016-08-03 | 21  | C2D1          | del_chr7_55174772_GGAATTAAGAGAAGC_- | EGFR   | p.745-750:KELREA/K | inframe_deletion     | COSM6223   | 0.0435  |
|        | 2016-08-31 | 49  | C3D1          | del_chr7_55174772_GGAATTAAGAGAAGC_- | EGFR   | p.745-750:KELREA/K | inframe_deletion     | COSM6223   | 0.2167  |
|        | 2016-11-02 | 112 | C6D1          | del_chr7_55174772_GGAATTAAGAGAAGC_- | EGFR   | p.745-750:KELREA/K | inframe_deletion     | COSM6223   | 0.0249  |
|        | 2017-01-25 | 196 | C9D1          | No call for this sample             | NA     | NA                 | NA                   | NA         | NA      |
|        | 2017-04-19 | 280 | C12D1         | del_chr7_55174772_GGAATTAAGAGAAGC_- | EGFR   | p.745-750:KELREA/K | inframe_deletion     | COSM6223   | 0.0943  |
|        |            |     |               | del_chr17_7673758 T -               | TP53   | p.288:N/X          | frameshift_variant   | COSM45459  | 0.1418  |
|        | 2017-07-19 | 371 | C15D1         | del_chr7_55174772_GGAATTAAGAGAAGC_- | EGFR   | p.745-750:KELREA/K | inframe_deletion     | COSM6223   | 0.0532  |
|        | 2017-09-21 | 435 | C17D1         | del_chr7_55174772_GGAATTAAGAGAAGC_- | EGFR   | p.745-750:KELREA/K | inframe_deletion     | COSM6223   | 0.1276  |
|        | 2017-12-13 | 518 | C20D1         | del_chr7_55174772_GGAATTAAGAGAAGC_- | EGFR   | p.745-750:KELREA/K | inframe_deletion     | COSM6223   | 0.0305  |
|        | 2018-03-07 | 602 | C23D1         | No call for this sample             | NA     | NA                 | NA                   | NA         | NA      |
|        | 2018-05-30 | 686 | C26D1         | del_chr7_55174772_GGAATTAAGAGAAGC_- | EGFR   | p.745-750:KELREA/K | inframe_deletion     | COSM6223   | 0.1875  |
|        | 2018-08-22 | 770 | C29D1         | No call for this sample             | NA     | NA                 | NA                   | NA         | NA      |
|        | 2018-11-14 | 854 | C32D1         | No call for this sample             | NA     | NA                 | NA                   | NA         | NA      |
|        | 2019-02-06 | 938 | C35D1         | del_chr7_55174772_GGAATTAAGAGAAGC_- | EGFR   | p.745-750:KELREA/K | inframe_deletion     | COSM6223   | 0.0688  |
| LAT005 | 2016-08-17 | 0   | ReTxC1D0      | mis_chr17_7674180 C T               | TP53   | NA                 | splice_donor_variant | NA         | 19.4459 |
|        |            |     |               | mis_chr7_55191822 T G               | EGFR   | p.L858R            | missense_variant     | COSM6224   | 14.3879 |
|        | 2016-08-24 | 7   | ReTxC1D7      | amplification_ERBB2                 | ERBB2  | NA                 | NA                   | NA         | NA      |
|        |            |     |               | mis_chr17_7674180 C T               | TP53   | NA                 | splice_donor_variant | NA         | 21.2406 |
|        |            |     |               | mis_chr7_55191822 T G               | EGFR   | p.L858R            | missense_variant     | COSM6224   | 17.5627 |
|        | 2016-09-07 | 21  | ReTxC2D1      | amplification_EGFR                  | EGFR   | NA                 | NA                   | NA         | NA      |
|        |            |     |               | amplification_ERBB2                 | ERBB2  | NA                 | NA                   | NA         | NA      |
|        |            |     |               | mis_chr17_7674180 C T               | TP53   | NA                 | splice_donor_variant | NA         | 17.1068 |
|        |            |     |               | mis_chr7_55181378 C T               | EGFR   | p.T790M            | missense_variant     | COSM6240   | 0.1484  |
|        |            |     |               | mis_chr7_55191822 T G               | EGFR   | p.L858R            | missense_variant     | COSM6224   | 15.1484 |
|        | 2016-09-28 | 42  | ReTxC3D1      | mis_chr17_7674180 C T               | TP53   | NA                 | splice_donor_variant | NA         | 38.6007 |
|        |            |     |               | mis_chr7_55191822 T G               | EGFR   | p.L858R            | missense_variant     | COSM6224   | 26.4249 |
|        | 2016-10-26 | 70  | ReTxC4D1      | amplification_ERBB2                 | ERBB2  | NA                 | NA                   | NA         | NA      |
|        |            |     |               | mis_chr17_7674180 C T               | TP53   | NA                 | splice_donor_variant | NA         | 38.5625 |
| LAT006 | 2016-08-03 | 0   | C1D0          | del_chr17_7676180 A -               | TP53   | p.63:A/X           | frameshift_variant   | NA         | 5.8523  |
|        |            |     |               | mis_chr7_55181378 C T               | EGFR   | p.T790M            | missense_variant     | COSM6240   | 0.1847  |
|        |            |     |               | mis_chr7_55191822 T G               | EGFR   | p.L858R            | missense_variant     | COSM6224   | 47.1733 |
|        | 2016-08-10 | 7   | C1D7          | del_chr17_7676180 A -               | TP53   | p.63:A/X           | frameshift_variant   | NA         | 1.1468  |
|        |            |     |               | mis_chr3_41224645 T C               | CTNNB1 | p.S45P             | missense_variant     | COSM5663   | 0.1262  |
|        |            |     |               | mis_chr7_55181378 C T               | EGFR   | p.T790M            | missense_variant     | COSM6240   | 0.2523  |
|        |            |     |               | mis_chr7_55191822 T G               | EGFR   | p.L858R            | missense_variant     | COSM6224   | 13.7844 |
|        | 2016-11-15 | 104 | C5D20         | mis_chr7_55191822 T G               | EGFR   | p.L858R            | missense_variant     | COSM6224   | 0.7627  |
|        | 2017-01-11 | 161 | ReTxC1D7      | mis_chr7_55191822 T G               | EGFR   | p.L858R            | missense_variant     | COSM6224   | 0.0448  |
|        | 2017-03-01 | 210 | ReTxC3D1      | del_chr17_7676180 A -               | TP53   | p.63:A/X           | frameshift_variant   | NA         | 2.7692  |
|        |            |     |               | mis_chr7_55191822 T G               | EGFR   | p.L858R            | missense_variant     | COSM6224   | 10.3846 |
|        |            |     |               | del_chr10_87864493 CGT -            | PTEN   | p.8-9:IVL          | inframe_deletion     | NA         | 0.1748  |
|        | 2017-06-19 | 320 | Off           | mis_chr7_55181378 C T               | EGFR   | p.T790M            | missense_variant     | COSM6240   | 0.1136  |
|        |            |     |               | mis_chr7_55191822 T G               | EGFR   | p.L858R            | missense_variant     | COSM6224   | 1.3287  |
|        | 2017-12-08 | 492 | Off           | del_chr17_7676180 A -               | TP53   | p.63:A/X           | frameshift_variant   | NA         | 1.2411  |
|        |            |     |               | mis_chr7_55191822 T G               | EGFR   | p.L858R            | missense_variant     | COSM6224   | 11.3653 |
|        | 2018-04-24 | 629 | Off           | No call for this sample             | NA     | NA                 | NA                   | NA         | NA      |
|        | 2018-05-17 | 652 | Off(CSF)      | del_chr17_7676180 A -               | TP53   | p.63:A/X           | frameshift_variant   | NA         | 92.1429 |
|        |            |     |               | mis_chr7_55191822 T G               | EGFR   | p.L858R            | missense_variant     | COSM6224   | 48.9286 |
| LAT007 | 2018-05-21 | 656 | Off(CSF)      | del_chr17_7676180 A -               | TP53   | p.63:A/X           | frameshift_variant   | NA         | 47.7652 |
|        |            |     |               | mis_chr7_55191822 T G               | EGFR   | p.L858R            | missense_variant     | COSM6224   | 30.3599 |
|        | 2018-05-24 | 659 | Off           | No call for this sample             | NA     | NA                 | NA                   | NA         | NA      |
|        | 2016-08-24 | 0   | C1D0          | del_chr7_55174772_GGAATTAAGAGAAGC_- | EGFR   | p.745-750:KELREA/K | inframe_deletion     | COSM6223   | 1.8532  |
|        |            |     |               | mis_chr10_87933023 T A              | PTEN   | p.Y88*             | stop_gained          | COSM428084 | 11.6434 |
|        | 2016-08-31 | 7   | C1D7          | del_chr7_55174772_GGAATTAAGAGAAGC_- | EGFR   | p.745-750:KELREA/K | inframe_deletion     | COSM6223   | 1.0870  |
|        |            |     |               | mis_chr10_87933023 T A              | PTEN   | p.Y88*             | stop_gained          | COSM428084 | 3.6957  |
|        | 2016-10-05 | 42  | C3D1          | mis_chr10_87933023 T A              | PTEN   | p.Y88*             | stop_gained          | COSM428084 | 5.2273  |
|        | 2017-02-08 | 168 | C8D1          | No call for this sample             | NA     | NA                 | NA                   | NA         | NA      |
|        | 2017-08-28 | 369 | C15D1         | mis_chr10_87933023 T A              | PTEN   | p.Y88*             | stop_gained          | COSM428084 | 0.6061  |
|        | 2017-11-21 | 454 | C18D1         | No call for this sample             | NA     | NA                 | NA                   | NA         | NA      |
|        | 2018-01-17 | 511 | C20D1         | mis_chr10_87933023 T A              | PTEN   | p.Y88*             | stop_gained          | COSM428084 | 4.9265  |
|        | 2018-05-04 | 618 | ReTxC1D7      | del_chr7_55174772_GGAATTAAGAGAAGC_- | EGFR   | p.745-750:KELREA/K | inframe_deletion     | COSM6223   | 0.0132  |
|        |            |     |               | del_chr7_55174772_GGAATTAAGAGAAGC_- | EGFR   | p.745-750:KELREA/K | inframe_deletion     | COSM6223   | 0.0810  |
| LAT007 | 2018-05-23 | 637 | ReTxC2D1      | mis_chr10_87933023 T A              | PTEN   | p.Y88*             | stop_gained          | COSM428084 | 2.0139  |
|        | 2018-05-31 | 645 | ReTxC2D1(CSF) | del_chr7_55174772_GGAATTAAGAGAAGC_- | EGFR   | p.745-750:KELREA/K | inframe_deletion     | COSM6223   | 58.0688 |
|        | 2018-06-20 | 665 | ReTxC3D1      | mis_chr10_87933023 T A              | PTEN   | p.Y88*             | stop_gained          | COSM428084 | 0.4875  |
|        |            |     |               | mis_chr7_55191802 C G               | EGFR   | p.V851V            | synonymous_variant   | NA         | 0.1375  |
|        | 2018-07-17 | 692 | ReTxC4D1      | mis_chr10_87933023 T A              | PTEN   | p.Y88*             | stop_gained          | COSM428084 | 0.4750  |

|        |            |     |               |                                             |        |                     |                          |             |         |
|--------|------------|-----|---------------|---------------------------------------------|--------|---------------------|--------------------------|-------------|---------|
|        | 2018-08-15 | 721 | ReTxC5D1      | mis chr10_87933023 T A                      | PTEN   | p.Y88*              | stop_gained              | COSM428084  | 0.3674  |
|        | 2018-08-17 | 723 | ReTxC5D3(CSF) | del_chr7_55174772_GGAATTAAGAGAAGC_-         | EGFR   | p.745-750:KELREA/K  | inframe_deletion         | COSM6223    | 66.0276 |
|        | 2018-09-12 | 749 | ReTxC6D1      | mis chr10_87933023 T A                      | PTEN   | p.Y88*              | stop_gained              | COSM428084  | 0.4464  |
| LAT008 | 2016-09-13 | 0   | C1D0          | del_chr7_55174772_GGAATTAAGAGAAGC_-         | EGFR   | p.745-750:KELREA/K  | inframe_deletion         | COSM6223    | 5.4767  |
|        |            |     |               | ins_chr17_7675116_-TTTT                     | TP53   | p.165-166:-/KX      | frameshift_variant       | NA          | 1.0233  |
|        |            |     |               | mis_chr17_7675116 A T                       | TP53   | p.S166T             | missense_variant         | COSM45336   | 1.0465  |
|        |            |     |               | mis_chr9_21971112 G A                       | CDKN2A | p.H83Y              | missense_variant         | COSM99723   | 0.8372  |
|        | 2016-09-21 | 8   | C1D7          | del_chr7_55174772_GGAATTAAGAGAAGC_-         | EGFR   | p.745-750:KELREA/K  | inframe_deletion         | COSM6223    | 0.1316  |
|        | 2017-01-11 | 120 | C6D1          | No call for this sample                     | NA     | NA                  | NA                       | NA          | NA      |
|        | 2017-07-26 | 316 | C13D1         | No call for this sample                     | NA     | NA                  | NA                       | NA          | 0.7192  |
|        | 2018-01-10 | 484 | C19D1         | No call for this sample                     | NA     | NA                  | NA                       | NA          | NA      |
|        | 2018-05-30 | 624 | C24D1         | No call for this sample                     | NA     | NA                  | NA                       | NA          | NA      |
| LAT009 | 2018-08-22 | 708 | C27D1         | No call for this sample                     | NA     | NA                  | NA                       | NA          | NA      |
|        | 2016-09-27 | -36 | Pre           | mis chr7_55181378 C T                       | EGFR   | p.T790M             | missense_variant         | COSM6240    | 47.4719 |
|        | 2017-02-22 | 112 | ReTxC5D1      | mis chr7_55181378 C T                       | EGFR   | p.T790M             | missense_variant         | COSM6240    | 51.1017 |
|        | 2017-05-17 | 196 | ReTxC8D1      | mis chr7_55181378 C T                       | EGFR   | p.T790M             | missense_variant         | COSM6240    | 47.8811 |
|        | 2017-08-09 | 280 | ReTxC11D1     | mis chr7_55181378 C T                       | EGFR   | p.T790M             | missense_variant         | COSM6240    | 47.3171 |
|        | 2018-01-23 | 447 | ReTxC17D1     | mis chr7_55181378 C T                       | EGFR   | p.T790M             | missense_variant         | COSM6240    | 46.5000 |
|        | 2018-06-13 | 588 | ReTxC22D1     | mis chr7_55181378 C T                       | EGFR   | p.T790M             | missense_variant         | COSM6240    | 47.6902 |
|        | 2018-09-05 | 672 | ReTxC25D1     | mis chr7_55181378 C T                       | EGFR   | p.T790M             | missense_variant         | COSM6240    | 48.0000 |
|        |            |     |               | amplification EGFR                          | EGFR   | NA                  | NA                       | NA          | NA      |
| LAT010 | 2016-11-16 | 0   | C1D0          | del_chr7_55174773_GAATTAAGAGAAGCA_-         | EGFR   | p.746-750:ELREA/-   | inframe_deletion         | COSM6225    | 48.9390 |
|        |            |     |               | mis chr17_7670700 G A                       | TP53   | p.R337C             | missense_variant         | COSM117591  | 13.6340 |
|        |            |     |               | del_chr7_55174773_GAATTAAGAGAAGCA_-         | EGFR   | p.746-750:ELREA/-   | inframe_deletion         | COSM6225    | 1.7573  |
|        | 2016-11-23 | 7   | C1D7          | mis chr17_7670700 G A                       | TP53   | p.R337C             | missense_variant         | COSM117591  | 0.5616  |
|        |            |     |               | No call for this sample                     | NA     | NA                  | NA                       | NA          | NA      |
|        |            |     |               | No call for this sample                     | NA     | NA                  | NA                       | NA          | NA      |
|        | 2017-04-05 | 140 | C6D1          | No call for this sample                     | NA     | NA                  | NA                       | NA          | NA      |
|        | 2017-08-23 | 280 | C11D1         | No call for this sample                     | NA     | NA                  | NA                       | NA          | NA      |
|        | 2017-10-18 | 336 | C13D1         | del_chr7_55174773_GAATTAAGAGAAGCA_-         | EGFR   | p.746-750:ELREA/-   | inframe_deletion         | COSM6225    | 18.3166 |
|        |            |     |               | mis chr17_7670700 G A                       | TP53   | p.R337C             | missense_variant         | COSM117591  | 2.9146  |
|        |            |     |               | amplification EGFR                          | EGFR   | NA                  | NA                       | NA          | NA      |
|        | 2018-01-10 | 420 | C16D1         | del_chr7_55174773_GAATTAAGAGAAGCA_-         | EGFR   | p.746-750:ELREA/-   | inframe_deletion         | COSM6225    | 88.6125 |
|        |            |     |               | mis chr17_7670700 G A                       | TP53   | p.R337C             | missense_variant         | COSM117591  | 84.9125 |
|        |            |     |               | del_chr7_55174773_GAATTAAGAGAAGCA_-         | EGFR   | p.746-750:ELREA/-   | inframe_deletion         | COSM6225    | 19.9160 |
|        | 2018-03-26 | 495 | C18D20        | mis chr17_7670700 G A                       | TP53   | p.R337C             | missense_variant         | COSM117591  | 16.2185 |
|        |            |     |               | amplification EGFR                          | EGFR   | NA                  | NA                       | NA          | NA      |
|        |            |     |               | amplification ERBB2                         | ERBB2  | NA                  | NA                       | NA          | NA      |
|        | 2018-05-09 | 539 | Off           | del_chr7_55174773_GAATTAAGAGAAGCA_-         | EGFR   | p.746-750:ELREA/-   | inframe_deletion         | COSM6225    | 73.5313 |
|        |            |     |               | mis chr17_7670700 G A                       | TP53   | p.R337C             | missense_variant         | COSM117591  | 40.5875 |
|        |            |     |               | amplification EGFR                          | EGFR   | NA                  | NA                       | NA          | NA      |
|        | 2018-06-11 | 572 | Off           | del_chr7_55174773_GAATTAAGAGAAGCA_-         | EGFR   | p.746-750:ELREA/-   | inframe_deletion         | COSM6225    | 75.2250 |
|        |            |     |               | mis chr17_7670700 G A                       | TP53   | p.R337C             | missense_variant         | COSM117591  | 48.9125 |
|        |            |     |               | del_chr7_55174772_GGAATTAAGAGAAGC_-         | EGFR   | p.745-750:KELREA/K  | inframe_deletion         | COSM6223    | 0.6333  |
| LAT011 | 2016-09-28 | -56 | Pre           | mis chr9_21970917 C T                       | CDKN2A | p.A148T             | missense_variant         | COSM3774361 | 51.2000 |
|        |            |     |               | del_chr7_55174772_GGAATTAAGAGAAGC_-         | EGFR   | p.745-750:KELREA/K  | inframe_deletion         | COSM6223    | 0.2174  |
|        |            |     |               | mis chr9_21970917 C T                       | CDKN2A | p.A148T             | missense_variant         | COSM3774361 | 53.4783 |
|        | 2016-11-23 | 0   | C1D0          | mis chr9_21970917 C T                       | CDKN2A | p.A148T             | missense_variant         | COSM3774361 | 49.9573 |
|        | 2016-11-30 | 7   | C1D7          | mis chr9_21970917 C T                       | CDKN2A | p.A148T             | missense_variant         | COSM3774361 | 47.8182 |
|        | 2016-12-21 | 28  | C2D1          | mis chr9_21970917 C T                       | CDKN2A | p.A148T             | missense_variant         | COSM3774361 | 52.3214 |
|        | 2017-08-02 | 252 | C10D1         | mis chr9_21970917 C T                       | CDKN2A | p.A148T             | missense_variant         | COSM6223    | 0.1807  |
|        | 2017-12-20 | 392 | C15D1         | del_chr7_55174772_GGAATTAAGAGAAGC_-         | EGFR   | p.745-750:KELREA/K  | inframe_deletion         | COSM3774361 | 49.8193 |
|        |            |     |               | mis chr9_21970917 C T                       | CDKN2A | p.A148T             | missense_variant         | COSM3774361 | 52.1514 |
|        |            |     |               | mis chr9_21970917 C T                       | CDKN2A | p.A148T             | missense_variant         | COSM3774361 | 6.3659  |
|        | 2018-01-16 | 419 | ReTxC1D7      | del_chr7_55174772_GGAATTAAGAGAAGC_-         | EGFR   | p.745-750:KELREA/K  | inframe_deletion         | COSM6223    | 47.7561 |
|        |            |     |               | mis chr9_21970917 C T                       | CDKN2A | p.A148T             | missense_variant         | COSM3774361 | NA      |
|        |            |     |               | amplification ERBB2                         | ERBB2  | NA                  | NA                       | NA          | NA      |
|        | 2018-05-30 | 553 | Off           | del_chr7_55174772_GGAATTAAGAGAAGC_-         | EGFR   | p.745-750:KELREA/K  | inframe_deletion         | COSM6223    | 43.9375 |
|        |            |     |               | mis chr9_21970917 C T                       | CDKN2A | p.A148T             | missense_variant         | COSM3774361 | 15.1500 |
|        |            |     |               | mis chr17_7673802 C A                       | TP53   | p.R273L             | missense_variant         | COSM1640828 | 15.2375 |
| LAT013 | 2016-12-07 | 0   | C1D0          | mis chr7_55174774_AATTAAGAGAAGCAACATCTC_TCT | EGFR   | p.ELREATSP746-753VS | protein_altering_variant | NA          | 30.2000 |
|        |            |     |               | mis chr7_55174775_A C                       | EGFR   | p.E746D             | missense_variant         | NA          | 0.3000  |
|        |            |     |               | mis chr7_55181378 C T                       | EGFR   | p.T790M             | missense_variant         | COSM6240    | 10.2938 |
|        |            |     |               | mis chr17_7673802 C A                       | TP53   | p.R273L             | missense_variant         | COSM1640828 | 3.1194  |
|        | 2016-12-14 | 7   | C1D7          | mis chr7_55174774_AATTAAGAGAAGCAACATCTC_TCT | EGFR   | p.ELREATSP746-753VS | protein_altering_variant | NA          | 6.1343  |
|        |            |     |               | mis chr7_55181378 C T                       | EGFR   | p.T790M             | missense_variant         | COSM6240    | 1.6642  |
|        |            |     |               | mis chr17_7673802 C A                       | TP53   | p.R273L             | missense_variant         | COSM1640828 | 0.2632  |
|        | 2017-02-01 | 56  | C3D1          | mis chr17_7673802 C A                       | TP53   | p.R273L             | missense_variant         | COSM1640828 | 0.5344  |
|        |            |     |               | mis chr17_7673802 C A                       | TP53   | p.R273L             | missense_variant         | COSM1640828 | 0.5344  |
|        |            |     |               | mis chr7_55174774_AATTAAGAGAAGCAACATCTC_TCT | EGFR   | p.ELREATSP746-753VS | protein_altering_variant | NA          | 0.2290  |
|        | 2017-03-01 | 84  | C4D1          | mis chr17_7673802 C A                       | TP53   | p.R273L             | missense_variant         | COSM1640828 | 0.8943  |
|        |            |     |               | mis chr7_55174774_AATTAAGAGAAGCAACATCTC_TCT | EGFR   | p.ELREATSP746-753VS | protein_altering_variant | NA          | 2.1545  |
|        |            |     |               | amplification MET                           | MET    | NA                  | NA                       | NA          | NA      |
|        | 2017-03-29 | 112 | C5D1          | mis chr17_7673802 C A                       | TP53   | p.R273L             | missense_variant         | COSM1640828 | 2.5676  |
|        |            |     |               | mis chr7_55174774_AATTAAGAGAAGCAACATCTC_TCT | EGFR   | p.ELREATSP746-753VS | protein_altering_variant | NA          | 3.7297  |
|        |            |     |               | mis chr7_55191822 T G                       | EGFR   | p.L858R             | missense_variant         | COSM6224    | 0.4865  |
|        | 2017-05-24 | 168 | C7D1          | amplification MET                           | MET    | NA                  | NA                       | NA          | NA      |
|        |            |     |               | mis chr17_7673802 C A                       | TP53   | p.R273L             | missense_variant         | COSM1640828 | 4.9722  |
|        |            |     |               | mis chr17_7673802 C A                       | TP53   | p.R273L             | missense_variant         | COSM1640828 | 4.9722  |

|  |            |     |          |                                                                                                     |                      |                                                     |                                                          |                                    |                            |
|--|------------|-----|----------|-----------------------------------------------------------------------------------------------------|----------------------|-----------------------------------------------------|----------------------------------------------------------|------------------------------------|----------------------------|
|  |            |     |          | mis_chr7_55174774_AATTAAGAGAAGCAACATCTC_TCT                                                         | EGFR                 | p.ELREATSP746-753VS                                 | protein_altering_variant                                 | NA                                 | 7.0139                     |
|  |            |     |          | mis_chr7_55181378_C_T                                                                               | EGFR                 | p.T790M                                             | missense_variant                                         | COSM6240                           | 0.1250                     |
|  |            |     |          | amplification_EGFR                                                                                  | EGFR                 | NA                                                  | NA                                                       | NA                                 | NA                         |
|  | 2016-12-28 | 0   | C1D0     | mis_chr17_7675224_G_C                                                                               | TP53                 | p.L130V                                             | missense_variant                                         | COSM437616                         | 5.1646                     |
|  |            |     |          | mis_chr7_55191822_T_G                                                                               | EGFR                 | p.L858R                                             | missense_variant                                         | COSM6224                           | 27.3560                    |
|  | 2017-01-04 | 7   | C1D7     | mis_chr17_7675224_G_C                                                                               | TP53                 | p.L130V                                             | missense_variant                                         | COSM437616                         | 2.0769                     |
|  |            |     |          | mis_chr7_55191822_T_G                                                                               | EGFR                 | p.L858R                                             | missense_variant                                         | COSM6224                           | 11.1846                    |
|  | 2017-01-25 | 28  | C2D1     | mis_chr17_7675224_G_C                                                                               | TP53                 | p.L130V                                             | missense_variant                                         | COSM437616                         | 0.9328                     |
|  |            |     |          | mis_chr7_55191822_T_G                                                                               | EGFR                 | p.L858R                                             | missense_variant                                         | COSM6224                           | 4.3843                     |
|  | 2017-03-22 | 84  | C4D1     | mis_chr17_7675224_G_C                                                                               | TP53                 | p.L130V                                             | missense_variant                                         | COSM437616                         | 1.1170                     |
|  |            |     |          | mis_chr7_55191822_T_G                                                                               | EGFR                 | p.L858R                                             | missense_variant                                         | COSM6224                           | 9.8803                     |
|  |            |     |          | amplification_EGFR                                                                                  | EGFR                 | NA                                                  | NA                                                       | NA                                 | NA                         |
|  | 2017-05-17 | 140 | C6D1     | mis_chr17_7675224_G_C                                                                               | TP53                 | p.L130V                                             | missense_variant                                         | COSM437616                         | 4.2821                     |
|  |            |     |          | mis_chr7_55191822_T_G                                                                               | EGFR                 | p.L858R                                             | missense_variant                                         | COSM6224                           | 36.5000                    |
|  |            |     |          | amplification_EGFR                                                                                  | EGFR                 | NA                                                  | NA                                                       | NA                                 | NA                         |
|  | 2017-10-04 | 280 | C11D1    | amplification_KRAS                                                                                  | KRAS                 | NA                                                  | NA                                                       | NA                                 | NA                         |
|  |            |     |          | mis_chr17_7675224_G_C                                                                               | TP53                 | p.L130V                                             | missense_variant                                         | COSM437616                         | 8.5377                     |
|  |            |     |          | mis_chr7_55191822_T_G                                                                               | EGFR                 | p.L858R                                             | missense_variant                                         | COSM6224                           | 49.6855                    |
|  |            |     |          | amplification_EGFR                                                                                  | EGFR                 | NA                                                  | NA                                                       | NA                                 | NA                         |
|  | 2017-11-01 | 308 | C12D1    | amplification_KRAS                                                                                  | KRAS                 | NA                                                  | NA                                                       | NA                                 | NA                         |
|  |            |     |          | mis_chr17_7675224_G_C                                                                               | TP53                 | p.L130V                                             | missense_variant                                         | COSM437616                         | 6.6591                     |
|  |            |     |          | mis_chr7_55191822_T_G                                                                               | EGFR                 | p.L858R                                             | missense_variant                                         | COSM6224                           | 45.2614                    |
|  | 2018-05-04 | 492 | Off      | mis_chr17_7675224_G_C                                                                               | TP53                 | p.L130V                                             | missense_variant                                         | COSM437616                         | 0.3250                     |
|  |            |     |          | mis_chr7_55191822_T_G                                                                               | EGFR                 | p.L858R                                             | missense_variant                                         | COSM6224                           | 0.3063                     |
|  | 2018-07-11 | 560 | Off      | mis_chr17_7675224_G_C                                                                               | TP53                 | p.L130V                                             | missense_variant                                         | COSM437616                         | 6.2750                     |
|  |            |     |          | mis_chr7_55191822_T_G                                                                               | EGFR                 | p.L858R                                             | missense_variant                                         | COSM6224                           | 11.5000                    |
|  |            |     |          | amplification_MET                                                                                   | MET                  | NA                                                  | NA                                                       | NA                                 | NA                         |
|  | 2018-08-31 | 611 | Off      | mis_chr17_7675224_G_C                                                                               | TP53                 | p.L130V                                             | missense_variant                                         | COSM437616                         | 14.6296                    |
|  |            |     |          | mis_chr7_55191822_T_G                                                                               | EGFR                 | p.L858R                                             | missense_variant                                         | COSM6224                           | 25.3588                    |
|  |            |     |          | amplification_MET                                                                                   | MET                  | NA                                                  | NA                                                       | NA                                 | NA                         |
|  | 2018-09-17 | 628 | Off      | mis_chr17_7675224_G_C                                                                               | TP53                 | p.L130V                                             | missense_variant                                         | COSM437616                         | 51.0125                    |
|  |            |     |          | mis_chr7_55191822_T_G                                                                               | EGFR                 | p.L858R                                             | missense_variant                                         | COSM6224                           | 54.6188                    |
|  |            |     |          | amplification_MET                                                                                   | MET                  | NA                                                  | NA                                                       | NA                                 | NA                         |
|  | 2018-10-26 | 657 | Off      | mis_chr17_7675224_G_C                                                                               | TP53                 | p.L130V                                             | missense_variant                                         | COSM437616                         | 72.1000                    |
|  |            |     |          | mis_chr7_55191822_T_G                                                                               | EGFR                 | p.L858R                                             | missense_variant                                         | COSM6224                           | 65.0563                    |
|  | 2017-01-18 | -21 | Pre      | No call for this sample                                                                             | NA                   | NA                                                  | NA                                                       | NA                                 | NA                         |
|  | 2017-02-06 | 2   | Pre      | No call for this sample                                                                             | NA                   | NA                                                  | NA                                                       | NA                                 | NA                         |
|  | 2017-02-15 | 7   | ReTxC1D7 | mis_chr7_55181378_C_T                                                                               | NA                   | NA                                                  | NA                                                       | NA                                 | NA                         |
|  | 2017-04-05 | 56  | ReTxC3D1 | No call for this sample                                                                             | NA                   | NA                                                  | NA                                                       | NA                                 | NA                         |
|  | 2017-05-31 | 112 | ReTxC5D1 | mis_chr7_55191822_T_G                                                                               | NA                   | NA                                                  | NA                                                       | NA                                 | NA                         |
|  | 2017-02-08 | 0   | C1D0     | del_chr7_55174772_GGAATTAAGAGAAGC_-<br>mis_chr17_7675143_C_A                                        | EGFR<br>TP53         | p.745-750:KELREA/K<br>p.V157F                       | inframe_deletion<br>missense_variant                     | COSM6223<br>COSM131483             | 4.9416<br>2.6070           |
|  |            |     |          | mis_chr7_55181378_C_T                                                                               | EGFR                 | p.T790M                                             | missense_variant                                         | COSM6240                           | 1.1187                     |
|  | 2017-02-15 | 7   | C1D7     | No call for this sample                                                                             | NA                   | NA                                                  | NA                                                       | NA                                 | NA                         |
|  | 2017-05-30 | 11  | C5D1     | No call for this sample                                                                             | NA                   | NA                                                  | NA                                                       | NA                                 | NA                         |
|  | 2017-11-15 | 280 | C11D1    | mis_chr7_55174035_G_A                                                                               | EGFR                 | p.V726M                                             | missense_variant                                         | NA                                 | 0.4321                     |
|  | 2018-01-09 | 335 | C13D1    | No call for this sample                                                                             | NA                   | NA                                                  | NA                                                       | NA                                 | NA                         |
|  | 2018-04-04 | 420 | C16D1    | No call for this sample                                                                             | NA                   | NA                                                  | NA                                                       | NA                                 | NA                         |
|  | 2018-08-22 | 560 | C21D1    | del_chr7_55174772_GGAATTAAGAGAAGC_-<br>mis_chr17_7675143_C_A                                        | EGFR<br>TP53         | p.745-750:KELREA/K<br>p.V157F                       | inframe_deletion<br>missense_variant                     | COSM6223<br>COSM131483             | 2.6006<br>0.7328           |
|  | 2018-10-17 | 616 | C23D1    | No call for this sample                                                                             | NA                   | NA                                                  | NA                                                       | NA                                 | NA                         |
|  | 2018-12-12 | 672 | C25D1    | No call for this sample                                                                             | NA                   | NA                                                  | NA                                                       | NA                                 | NA                         |
|  | 2019-02-06 | 728 | C27D1    | del_chr7_55174772_GGAATTAAGAGAAGC_-<br>mis_chr17_7675143_C_A                                        | EGFR<br>TP53         | p.745-750:KELREA/K<br>p.V157F                       | inframe_deletion<br>missense_variant                     | COSM6223<br>COSM131483             | 4.6154<br>2.3846           |
|  | 2019-04-03 | 784 | C29D1    | del_chr7_55174772_GGAATTAAGAGAAGC_-<br>amplification_MET                                            | EGFR<br>MET          | p.745-750:KELREA/K<br>NA                            | inframe_deletion<br>NA                                   | COSM6223<br>NA                     | 0.0813                     |
|  | 2019-05-10 | 821 | Off      | del_chr7_55174772_GGAATTAAGAGAAGC_-<br>mis_chr17_7675143_C_A                                        | EGFR<br>TP53         | p.745-750:KELREA/K<br>p.V157F                       | inframe_deletion<br>missense_variant                     | COSM6223<br>COSM131483             | 16.1979<br>10.5208         |
|  | 2019-05-24 | 835 | ReTxC1D0 | del_chr7_55174772_GGAATTAAGAGAAGC_-<br>mis_chr17_7675143_C_A                                        | EGFR<br>TP53         | p.745-750:KELREA/K<br>p.V157F                       | inframe_deletion<br>missense_variant                     | COSM6223<br>COSM131483             | 2.3281<br>1.4063           |
|  | 2019-05-29 | 840 | ReTxC1D7 | del_chr7_55174772_GGAATTAAGAGAAGC_-<br>mis_chr17_7675143_C_A                                        | EGFR<br>TP53         | p.745-750:KELREA/K<br>p.V157F                       | inframe_deletion<br>missense_variant                     | COSM6223<br>COSM131483             | 0.4895<br>0.3846           |
|  | 2019-06-19 | 861 | ReTxC2D1 | No call for this sample                                                                             | NA                   | NA                                                  | NA                                                       | NA                                 | NA                         |
|  | 2019-08-14 | 917 | ReTxC4D1 | del_chr7_55174772_GGAATTAAGAGAAGC_-<br>del_chr7_55174772_GGAATTAAGAGAAGC_-<br>mis_chr17_7675143_C_A | EGFR<br>EGFR<br>TP53 | p.745-750:KELREA/K<br>p.745-750:KELREA/K<br>p.V157F | inframe_deletion<br>inframe_deletion<br>missense_variant | COSM6223<br>COSM6223<br>COSM131483 | 0.3412<br>0.3250<br>0.1375 |
|  | 2019-09-11 | 945 | ReTxC5D1 | del_chr7_55174772_GGAATTAAGAGAAGC_-<br>mis_chr17_7675143_C_A                                        | EGFR<br>TP53         | p.773-774:-NPH<br>p.R273C                           | inframe_insertion<br>missense_variant                    | COSM12381<br>COSM10659             | 5.5125<br>0.5000           |
|  | 2017-03-23 | 0   | C1D0     | ins_chr7_55181328_-AACCCCCAC<br>mis_chr17_7673803_G_A                                               | EGFR<br>TP53         | p.V769L<br>p.V769L                                  | missense_variant<br>missense_variant                     | NA<br>NA                           | 3.3438<br>1.8717           |
|  | 2017-03-29 | 6   | C1D7     | ins_chr7_55181328_-AACCCCCAC<br>mis_chr7_55181314_G_C                                               | EGFR<br>EGFR         | p.773-774:-NPH<br>p.V769L                           | inframe_insertion<br>missense_variant                    | COSM12381<br>NA                    | 3.4293<br>0.5526           |
|  | 2017-05-17 | 55  | C3D1     | ins_chr7_55181328_-AACCCCCAC<br>mis_chr7_55181314_G_C                                               | EGFR<br>EGFR         | p.773-774:-NPH<br>p.V769L                           | inframe_insertion<br>missense_variant                    | COSM12381<br>NA                    | 0.3684                     |
|  |            |     |          | ins_chr7_55181328_-AACCCCCAC                                                                        | EGFR                 | p.773-774:-NPH                                      | inframe_insertion                                        | COSM12381                          | 6.1673                     |

|        |            |     |          |                                        |      |                    |                          |           |         |
|--------|------------|-----|----------|----------------------------------------|------|--------------------|--------------------------|-----------|---------|
| LAT017 | 2017-08-09 | 139 | C6D1     | mis chr17_7673803 G A                  | TP53 | p.R273C            | missense_variant         | COSM10659 | 0.8188  |
|        |            |     |          | mis chr7_55181314 G C                  | EGFR | p.V769L            | missense_variant         | NA        | 3.5105  |
|        |            |     |          | amplification EGFR                     | EGFR | NA                 | NA                       | NA        | NA      |
|        | 2017-09-12 | 173 | ReTxClD0 | ins_chr7_55181328 - AACCCCCAC          | EGFR | p.773-774:-/NPH    | inframe_insertion        | COSM12381 | 27.8101 |
|        |            |     |          | mis chr17_7673803 G A                  | TP53 | p.R273C            | missense_variant         | COSM10659 | 2.5194  |
|        |            |     |          | mis chr7_55181314 G C                  | EGFR | p.V769L            | missense_variant         | NA        | 16.8702 |
|        |            |     |          | amplification EGFR                     | EGFR | NA                 | NA                       | NA        | NA      |
|        | 2017-09-20 | 181 | ReTxClD7 | ins_chr7_55181328 - AACCCCCAC          | EGFR | p.773-774:-/NPH    | inframe_insertion        | COSM12381 | 35.9125 |
|        |            |     |          | mis chr17_7673803 G A                  | TP53 | p.R273C            | missense_variant         | COSM10659 | 4.3125  |
| LAT019 |            |     |          | mis chr7_55181314 G C                  | EGFR | p.V769L            | missense_variant         | NA        | 21.6938 |
|        | 2017-06-28 | 0   | C1D0     | del chr7_55174772 GGAATTAAGAGAAGC -    | EGFR | p.745-750:KELREA/K | inframe_deletion         | COSM6223  | 0.0633  |
|        | 2017-07-05 | 7   | C1D7     | No call for this sample                | NA   | NA                 | NA                       | NA        | NA      |
|        | 2017-07-26 | 28  | C2D1     | mis chr7_55181378 C T                  | EGFR | p.T790M            | missense_variant         | COSM6240  | 0.4717  |
|        | 2017-08-23 | 56  | C3D1     | No call for this sample                | NA   | NA                 | NA                       | NA        | NA      |
|        | 2017-11-15 | 140 | C6D1     | No call for this sample                | NA   | NA                 | NA                       | NA        | NA      |
|        | 2018-02-07 | 224 | C9D1     | No call for this sample                | NA   | NA                 | NA                       | NA        | NA      |
|        | 2018-05-02 | 308 | C12D1    | No call for this sample                | NA   | NA                 | NA                       | NA        | NA      |
|        | 2018-07-25 | 392 | C15D1    | No call for this sample                | NA   | NA                 | NA                       | NA        | NA      |
|        | 2018-10-17 | 476 | C18D1    | No call for this sample                | NA   | NA                 | NA                       | NA        | NA      |
|        | 2019-01-09 | 560 | C21D1    | No call for this sample                | NA   | NA                 | NA                       | NA        | NA      |
|        | 2019-04-03 | 644 | C24D1    | No call for this sample                | NA   | NA                 | NA                       | NA        | NA      |
| LAT021 | 2017-10-25 | -2  | Pre      | del chr7_55174772 GGAATTAAGAGAAGC -    | EGFR | p.745-750:KELREA/K | inframe_deletion         | COSM6223  | 5.1625  |
|        | 2017-11-01 | 5   | C1D5     | del chr7_55174772 GGAATTAAGAGAAGC -    | EGFR | p.745-750:KELREA/K | inframe_deletion         | COSM6223  | 1.5375  |
|        | 2017-11-29 | 33  | C2D1     | No call for this sample                | NA   | NA                 | NA                       | NA        | NA      |
|        | 2018-01-24 | 89  | C4D1     | No call for this sample                | NA   | NA                 | NA                       | NA        | NA      |
|        | 2018-03-23 | 147 | C6D1     | No call for this sample                | NA   | NA                 | NA                       | NA        | NA      |
|        | 2018-04-18 | 173 | C7D1     | No call for this sample                | NA   | NA                 | NA                       | NA        | NA      |
|        | 2018-06-13 | 229 | C9D1     | No call for this sample                | NA   | NA                 | NA                       | NA        | NA      |
|        | 2018-08-20 | 297 | Off      | No call for this sample                | NA   | NA                 | NA                       | NA        | NA      |
|        | 2018-10-10 | 348 | ReTxClD7 | No call for this sample                | NA   | NA                 | NA                       | NA        | NA      |
|        | 2018-12-26 | 425 | ReTxClD1 | del chr7_55174772 GGAATTAAGAGAAGC -    | EGFR | p.745-750:KELREA/K | inframe_deletion         | COSM6223  | 0.3172  |
|        | 2019-01-23 | 453 | ReTxClD5 | del chr7_55174772 GGAATTAAGAGAAGC -    | EGFR | p.745-750:KELREA/K | inframe_deletion         | COSM6223  | 0.5172  |
|        | 2019-02-04 | 465 | Off      | del chr7_55174772 GGAATTAAGAGAAGC -    | EGFR | p.745-750:KELREA/K | inframe_deletion         | COSM6223  | 0.4447  |
|        | 2019-02-13 | 474 | Off      | del chr7_55174772 GGAATTAAGAGAAGC -    | EGFR | p.745-750:KELREA/K | inframe_deletion         | COSM6223  | 7.5156  |
|        | 2019-03-06 | 495 | Off      | del chr7_55174772 GGAATTAAGAGAAGC -    | EGFR | p.745-750:KELREA/K | inframe_deletion         | COSM6223  | 0.4953  |
|        | 2019-04-10 | 530 | Off      | del chr7_55174772 GGAATTAAGAGAAGC -    | EGFR | p.745-750:KELREA/K | inframe_deletion         | COSM6223  | 1.1982  |
|        | 2019-06-08 | 589 | Off      | No call for this sample                | NA   | NA                 | NA                       | NA        | NA      |
|        | 2017-11-29 | 0   | C1D0     | del chr17_7673788 G -                  | TP53 | p.278:P/X          | frameshift_variant       | COSM45178 | 0.2604  |
|        |            |     |          | mis chr7_55174776 TTAAGAGAAG C         | EGFR | p.LREA747-750P     | protein_altering_variant | NA        | 1.0417  |
|        | 2017-12-06 | 7   | C1D7     | No call for this sample                | NA   | NA                 | NA                       | NA        | NA      |
| LAT022 | 2017-12-27 | 28  | C2D1     | No call for this sample                | NA   | NA                 | NA                       | NA        | NA      |
|        | 2018-01-23 | 55  | C3D1     | No call for this sample                | NA   | NA                 | NA                       | NA        | NA      |
|        | 2018-04-18 | 140 | C6D1     | No call for this sample                | NA   | NA                 | NA                       | NA        | NA      |
|        | 2018-07-10 | 223 | C9D1     | No call for this sample                | NA   | NA                 | NA                       | NA        | NA      |
|        | 2018-10-03 | 308 | C12D1    | No call for this sample                | NA   | NA                 | NA                       | NA        | NA      |
|        | 2018-12-28 | 394 | C15D1    | No call for this sample                | NA   | NA                 | NA                       | NA        | NA      |
|        | 2019-03-20 | 476 | C18D1    | No call for this sample                | NA   | NA                 | NA                       | NA        | NA      |
|        | 2019-06-11 | 559 | C21D1    | No call for this sample                | NA   | NA                 | NA                       | NA        | NA      |
|        | 2019-07-10 | 588 | C22D1    | No call for this sample                | NA   | NA                 | NA                       | NA        | NA      |
|        | 2019-08-09 | 618 | ReTxClD0 | No call for this sample                | NA   | NA                 | NA                       | NA        | NA      |
|        | 2019-08-14 | 623 | ReTxClD5 | No call for this sample                | NA   | NA                 | NA                       | NA        | NA      |
|        | 2019-09-03 | 643 | ReTxClD1 | No call for this sample                | NA   | NA                 | NA                       | NA        | NA      |
|        | 2019-10-01 | 671 | ReTxClD1 | No call for this sample                | NA   | NA                 | NA                       | NA        | NA      |
|        | 2017-12-20 | -7  | Pre      | del chr17_7676149 CCACGGG -            | TP53 | p.72-74:PVA/X      | frameshift_variant       | NA        | 2.2951  |
|        |            |     |          | mis chr7_55174774 AATTAAGAGAAGCA CGCCG | EGFR | p.ELREA746-750AP   | protein_altering_variant | NA        | 7.5410  |
| LAT023 | 2017-12-27 | 0   | C1D0     | del chr17_7676149 CCACGGG -            | TP53 | p.72-74:PVA/X      | frameshift_variant       | NA        | 1.5816  |
|        |            |     |          | mis chr7_55174774 AATTAAGAGAAGCA CGCCG | EGFR | p.ELREA746-750AP   | protein_altering_variant | NA        | 4.4133  |
|        | 2018-01-03 | 7   | C1D7     | No call for this sample                | NA   | NA                 | NA                       | NA        | NA      |
|        | 2018-02-20 | 55  | C3D1     | No call for this sample                | NA   | NA                 | NA                       | NA        | NA      |
|        | 2018-05-16 | 140 | C6D1     | No call for this sample                | NA   | NA                 | NA                       | NA        | NA      |
|        | 2018-08-07 | 223 | C9D1     | No call for this sample                | NA   | NA                 | NA                       | NA        | NA      |
|        | 2018-10-31 | 308 | C12D1    | No call for this sample                | NA   | NA                 | NA                       | NA        | NA      |
|        | 2019-01-23 | 392 | C15D1    | No call for this sample                | NA   | NA                 | NA                       | NA        | NA      |
|        | 2019-04-17 | 476 | C18D1    | No call for this sample                | NA   | NA                 | NA                       | NA        | NA      |
|        | 2019-07-09 | 559 | C21D1    | No call for this sample                | NA   | NA                 | NA                       | NA        | NA      |
|        | 10/3/19    | 645 | C24D1    | del chr17_7676149 CCACGGG -            | TP53 | p.72-74:PVA/X      | frameshift_variant       | NA        | 0.4878  |
|        |            |     |          | mis chr7_55174774 AATTAAGAGAAGCA CGCCG | EGFR | p.ELREA746-750AP   | protein_altering_variant | NA        | 2.9268  |
| LAT024 | 2017-11-29 | -43 | Pre      | No call for this sample                | NA   | NA                 | NA                       | NA        | NA      |
|        | 2018-01-10 | -1  | Pre      | del chr7_55174773 GAATTAAGAGAAGCA -    | EGFR | p.746-750:ELREA/-  | inframe_deletion         | COSM6225  | 0.3155  |
|        | 2018-01-11 | 0   | C1D0     | del chr7_55174773 GAATTAAGAGAAGCA -    | EGFR | p.746-750:ELREA/-  | inframe_deletion         | COSM6225  | 0.1025  |
|        | 2018-01-17 | 6   | C1D7     | No call for this sample                | NA   | NA                 | NA                       | NA        | NA      |
|        | 2018-02-14 | 34  | C2D1     | No call for this sample                | NA   | NA                 | NA                       | NA        | NA      |
|        | 2018-03-07 | 55  | C3D1     | No call for this sample                | NA   | NA                 | NA                       | NA        | NA      |
|        | 2018-05-30 | 139 | C6D1     | No call for this sample                | NA   | NA                 | NA                       | NA        | NA      |

|        |            |     |          |                                     |       |                    |                    |            |         |
|--------|------------|-----|----------|-------------------------------------|-------|--------------------|--------------------|------------|---------|
|        | 2018-08-22 | 223 | C9D1     | No call for this sample             | NA    | NA                 | NA                 | NA         | NA      |
|        | 2018-11-14 | 307 | C12D1    | No call for this sample             | NA    | NA                 | NA                 | NA         | NA      |
|        | 2019-02-06 | 391 | C15D1    | No call for this sample             | NA    | NA                 | NA                 | NA         | NA      |
|        | 2018-04-11 | -14 | Pre      | No call for this sample             | NA    | NA                 | NA                 | NA         | NA      |
| LAT025 | 2018-04-25 | 0   | C1D0     | del_chr7_55174772_GGAATTAAGAGAAGC_- | EGFR  | p.745-750:KELREA/K | inframe_deletion   | COSM6223   | 0.0207  |
|        | 2018-05-02 | 7   | C1D7     | del_chr7_55174772_GGAATTAAGAGAAGC_- | EGFR  | p.745-750:KELREA/K | inframe_deletion   | COSM6223   | 0.0391  |
|        | 2018-05-23 | 28  | C2D1     | No call for this sample             | NA    | NA                 | NA                 | NA         | NA      |
|        | 2018-06-20 | 56  | C3D1     | No call for this sample             | NA    | NA                 | NA                 | NA         | NA      |
|        | 2018-09-12 | 140 | C6D1     | No call for this sample             | NA    | NA                 | NA                 | NA         | NA      |
|        | 2018-12-05 | 224 | C9D1     | No call for this sample             | NA    | NA                 | NA                 | NA         | NA      |
|        | 2019-01-04 | 254 | ReTxC1D0 | No call for this sample             | NA    | NA                 | NA                 | NA         | NA      |
|        | 2019-01-30 | 280 | ReTxC2D1 | del_chr17_7674280_TCAG_-            | TP53  | p.227-228:SD/X     | frameshift_variant | NA         | 0.0858  |
|        |            |     |          | mis_chr12_25245351_C_A              | KRAS  | p.G12C             | missense_variant   | COSM516    | 0.5687  |
|        | 2019-02-27 | 308 | ReTxC3D1 | del_chr17_7674280_TCAG_-            | TP53  | p.227-228:SD/X     | frameshift_variant | NA         | 0.1681  |
|        |            |     |          | mis_chr12_25245351_C_A              | KRAS  | p.G12C             | missense_variant   | COSM516    | 2.2794  |
|        | 2019-03-15 | 324 | Off      | No call for this sample             | NA    | NA                 | NA                 | NA         | NA      |
| LAT026 | 2018-05-02 | -36 | Pre      | No call for this sample             | NA    | NA                 | NA                 | NA         | NA      |
|        | 2018-06-07 | 0   | C1D0     | No call for this sample             | NA    | NA                 | NA                 | NA         | NA      |
|        | 2018-06-13 | 6   | C1D7     | No call for this sample             | NA    | NA                 | NA                 | NA         | NA      |
|        | 2018-07-05 | 28  | C2D1     | mis_chr10_121498499_C_A             | FGFR2 | p.Q557H            | missense_variant   | NA         | 0.2703  |
|        | 2018-08-01 | 55  | C3D1     | No call for this sample             | NA    | NA                 | NA                 | NA         | NA      |
|        | 2018-10-31 | 146 | C6D1     | No call for this sample             | NA    | NA                 | NA                 | NA         | NA      |
|        | 2018-12-19 | 195 | C8D1     | No call for this sample             | NA    | NA                 | NA                 | NA         | NA      |
|        | 2019-03-13 | 279 | C11D1    | No call for this sample             | NA    | NA                 | NA                 | NA         | NA      |
|        | 2019-06-05 | 363 | C14D1    | No call for this sample             | NA    | NA                 | NA                 | NA         | NA      |
|        | 2019-06-17 | 375 | Off      | No call for this sample             | NA    | NA                 | NA                 | NA         | NA      |
|        | 2019-07-03 | 391 | Off      | No call for this sample             | NA    | NA                 | NA                 | NA         | NA      |
|        | 2019-08-07 | 426 | ReTxC1D0 | No call for this sample             | NA    | NA                 | NA                 | NA         | NA      |
|        | 2019-08-14 | 433 | ReTxC1D7 | No call for this sample             | NA    | NA                 | NA                 | NA         | NA      |
|        | 2019-09-04 | 454 | ReTxC2D1 | No call for this sample             | NA    | NA                 | NA                 | NA         | NA      |
|        | 2019-10-02 | 482 | ReTxC3D1 | No call for this sample             | NA    | NA                 | NA                 | NA         | NA      |
| LAT028 | 2018-10-24 | -2  | Pre      | del_chr7_55174773_GAATTAAGAGAAGCA_- | EGFR  | p.746-750:ELREA/-  | inframe_deletion   | COSM6225   | 1.2125  |
|        |            |     |          | mis_chr17_7675124_T_C               | TP53  | p.Y163C            | missense_variant   | COSM129852 | 0.5875  |
|        | 2018-10-26 | 0   | C1D0     | del_chr7_55174773_GAATTAAGAGAAGCA_- | EGFR  | p.746-750:ELREA/-  | inframe_deletion   | COSM6225   | 1.3563  |
|        |            |     |          | mis_chr17_7675124_T_C               | TP53  | p.Y163C            | missense_variant   | COSM129852 | 0.5625  |
|        | 2018-10-31 | 5   | C1D7     | del_chr7_55174773_GAATTAAGAGAAGCA_- | EGFR  | p.746-750:ELREA/-  | inframe_deletion   | COSM6225   | 0.7069  |
|        |            |     |          | mis_chr17_7675124_T_C               | TP53  | p.Y163C            | missense_variant   | COSM129852 | 0.3423  |
|        | 2018-11-21 | 26  | C2D1     | No call for this sample             | NA    | NA                 | NA                 | NA         | NA      |
|        | 2018-12-19 | 54  | C3D1     | No call for this sample             | NA    | NA                 | NA                 | NA         | NA      |
|        | 2019-01-16 | 82  | C4D1     | No call for this sample             | NA    | NA                 | NA                 | NA         | NA      |
|        | 2019-02-13 | 110 | C5D1     | del_chr7_55174773_GAATTAAGAGAAGCA_- | EGFR  | p.746-750:ELREA/-  | inframe_deletion   | COSM6225   | 0.6971  |
|        | 2019-03-13 | 138 | C6D1     | del_chr7_55174773_GAATTAAGAGAAGCA_- | EGFR  | p.746-750:ELREA/-  | inframe_deletion   | COSM6225   | 1.5044  |
|        | 2019-04-10 | 166 | C7D1     | del_chr7_55174773_GAATTAAGAGAAGCA_- | EGFR  | p.746-750:ELREA/-  | inframe_deletion   | COSM6225   | 3.0227  |
|        | 2019-05-08 | 194 | C8D1     | del_chr7_55174773_GAATTAAGAGAAGCA_- | EGFR  | p.746-750:ELREA/-  | inframe_deletion   | COSM6225   | 4.2834  |
|        | 2019-05-28 | 214 | ReTxC1D0 | del_chr7_55174773_GAATTAAGAGAAGCA_- | EGFR  | p.746-750:ELREA/-  | inframe_deletion   | COSM6225   | 0.1438  |
|        | 2019-06-05 | 222 | ReTxC1D7 | del_chr7_55174773_GAATTAAGAGAAGCA_- | EGFR  | p.746-750:ELREA/-  | inframe_deletion   | COSM6225   | 5.2000  |
|        |            |     |          | amplification_EGFR                  | EGFR  | NA                 | NA                 | NA         | NA      |
|        | 2019-06-26 | 243 | ReTxC2D1 | del_chr7_55174773_GAATTAAGAGAAGCA_- | EGFR  | p.746-750:ELREA/-  | inframe_deletion   | COSM6225   | 24.4225 |
|        |            |     |          | mis_chr17_7675124_T_C               | TP53  | p.Y163C            | missense_variant   | COSM129852 | 1.2535  |
|        | 2019-07-16 | 263 | Off      | del_chr7_55174773_GAATTAAGAGAAGCA_- | EGFR  | p.746-750:ELREA/-  | inframe_deletion   | COSM6225   | 0.8563  |
|        | 2019-07-29 | 276 | Off      | del_chr7_55174773_GAATTAAGAGAAGCA_- | EGFR  | p.746-750:ELREA/-  | inframe_deletion   | COSM6225   | 3.5813  |
|        |            |     |          | amplification_EGFR                  | EGFR  | NA                 | NA                 | NA         | NA      |
|        |            |     |          | del_chr7_55174773_GAATTAAGAGAAGCA_- | EGFR  | p.746-750:ELREA/-  | inframe_deletion   | COSM6225   | 27.6750 |
|        | 2019-08-23 | 301 | Off      | mis_chr17_7675124_T_C               | TP53  | p.Y163C            | missense_variant   | COSM129852 | 2.2000  |
